# Supplementary material for: Trib2 expression in granulocyte-monocyte progenitors drives a highly drug resistant acute myeloid leukaemia linked to elevated Bcl2
Source: PubMed Central journal article supplement (PMC5871090; doi:10.18632/oncotarget.24525), 2018-02-19
Supplement: oncotarget-09-14977-s001.pdf [file oncotarget-09-14977-s001.pdf]

## Trib2 expression in granulocyte-monocyte progenitors drives a highly drug resistant acute myeloid leukaemia linked to elevated Bcl2

### SUPPLEMENTARY MATERIALS

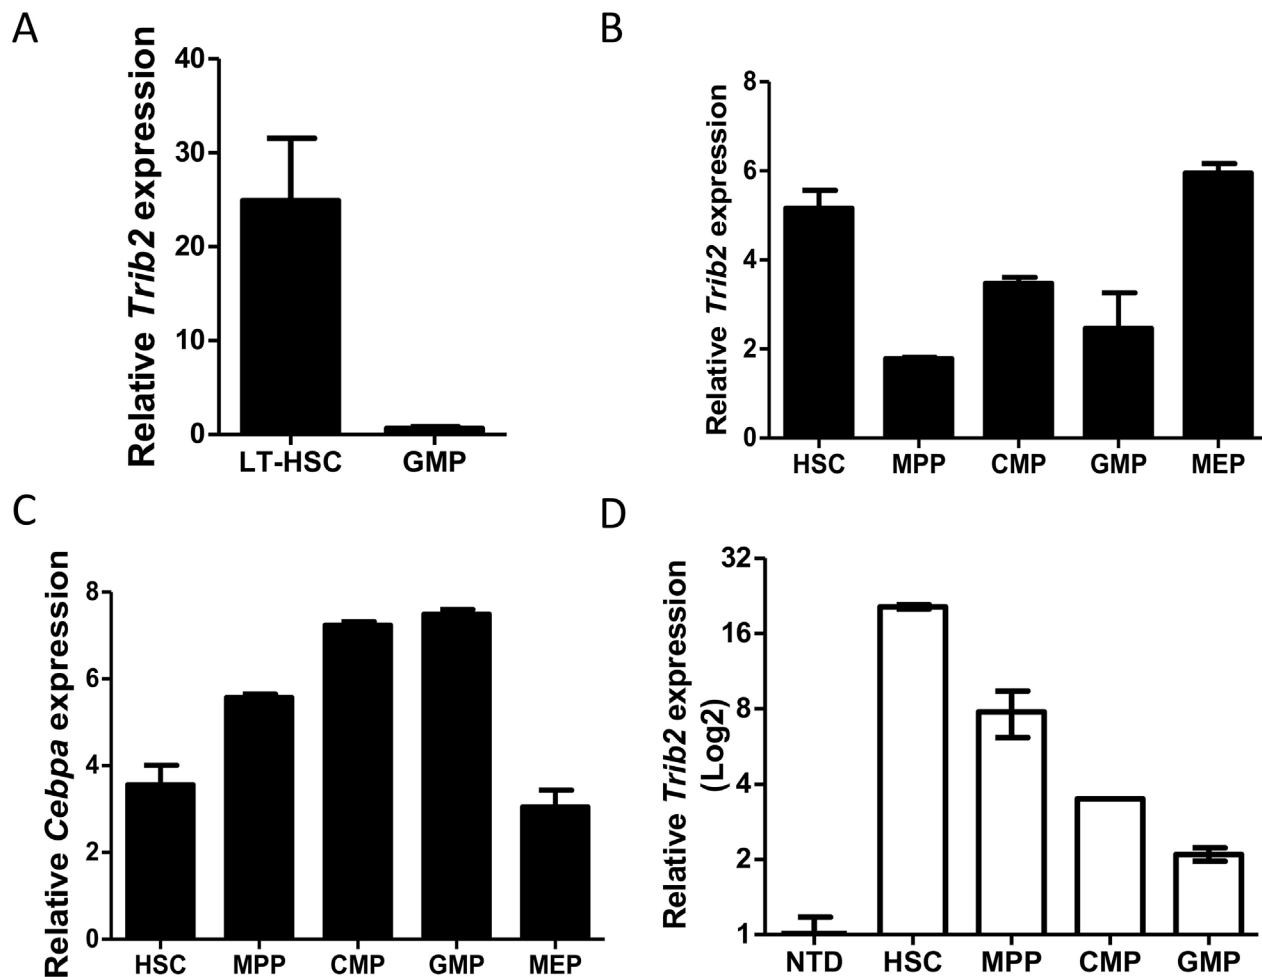

**Supplementary Figure 1: *Trib2* expression in stem and progenitor populations.** (A) Analysis of *Trib2* expression by qPCR in murine LT-HSC and GMP cells isolated from BM by FACS. Bars represent the average of 3 biological replicates each with technical duplicates. Error bars denote  $\pm$  SD. Analysis of (B) *Trib2* and (C) *Cebpa* expression in murine stem and progenitor populations using the RNA-seq dataset (GSE60101). Bars represent the average of n=4 HSC (Lin<sup>-</sup>, ckit<sup>+</sup>, Sca1<sup>+</sup>, Flk2<sup>-</sup>, CD34<sup>+</sup>), n=2 MPP (Lin<sup>-</sup>, ckit<sup>+</sup>, Sca1<sup>+</sup>, Flk2<sup>+</sup>, CD34<sup>+</sup>), n=2 CMP (Lin<sup>-</sup>, ckit<sup>+</sup>, Sca1<sup>-</sup>, CD34<sup>+</sup>, FcγRIII int), n=4 GMP (Lin<sup>-</sup>, ckit<sup>+</sup>, Sca1<sup>-</sup>, CD34<sup>+</sup>, FcγRIII high) and n=4 MEP (Lin<sup>-</sup>, ckit<sup>+</sup>, Sca1<sup>-</sup>, Flk2<sup>-</sup>, CD34<sup>-</sup>). Error bars denote  $\pm$  SD. (D) Analysis of Murine BM cells were sorted for HSC, MPP, CMP and GMP populations, transduced with phrTRIB2 lentivirus and sorted for GFP<sup>+</sup> cells 24hrs later. Graph represents analysis of *Trib2* expression by qPCR normalised to non-transduced (NTD) control. HPRT1 housekeeping gene was used to normalise the gene expression. Bars represent average of technical triplicates, error bars denote  $\pm$  SD.

A

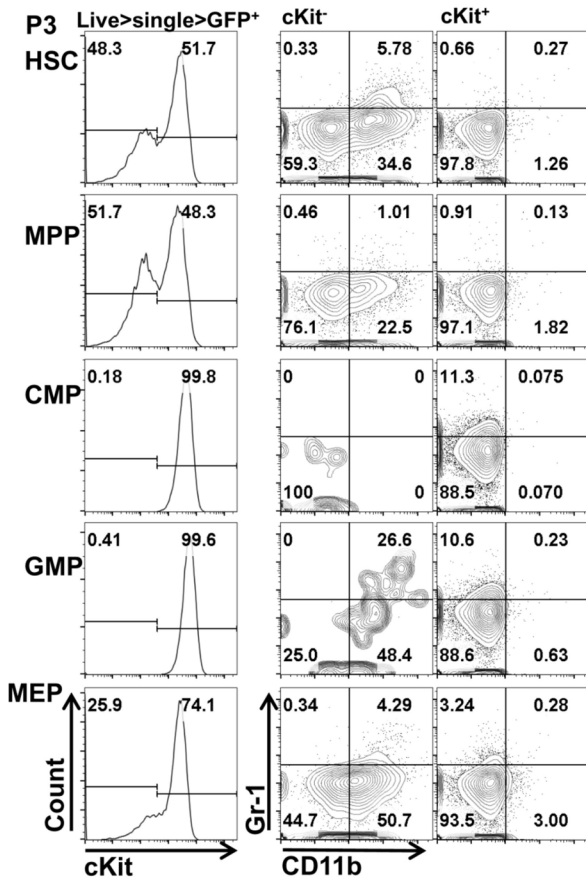

B

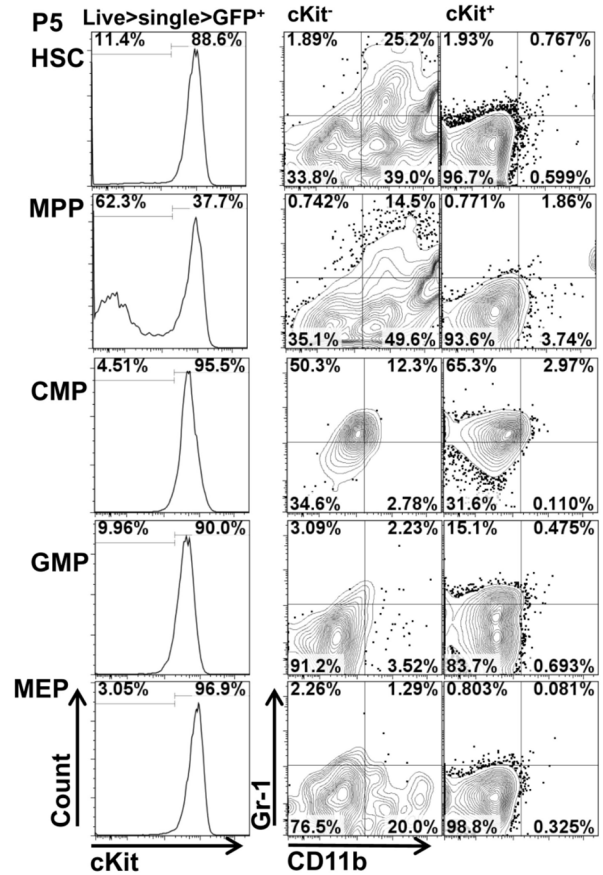

**Supplementary Figure 2:** (A) Representative flow cytometric analysis of Trib2 transformed P3 stem and progenitor populations showing cKit histograms (left) and CD11b and Gr1 expression through the cKit<sup>+</sup> (right) and cKit<sup>-</sup> gate (middle). Data are representative of 2 independent experiments. (B) Representative flow cytometric analysis of Trib2 transformed P5 stem and progenitor populations showing cKit histograms (left) and CD11b and Gr1 expression through the cKit<sup>+</sup> (right) and cKit<sup>-</sup> gate (middle). Data are representative of 2 independent experiments.

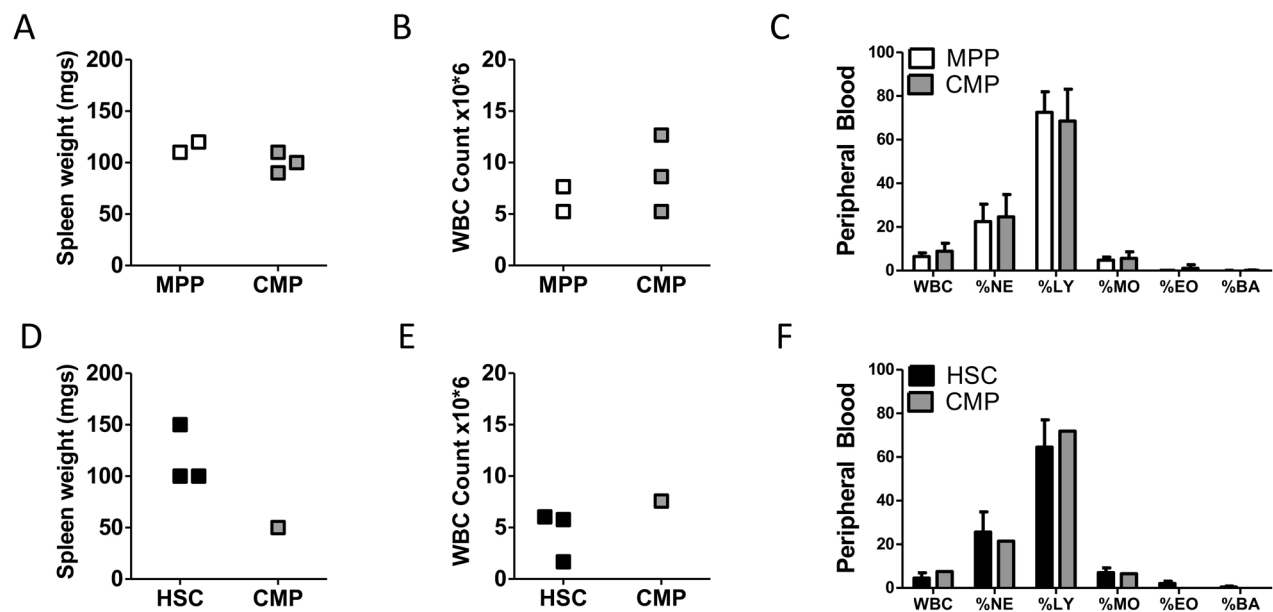

**Supplemental Figure 3: Normal myelopoiesis in non-engrafting MPP and CMP transplanted mice, and disease-free HSC and CMP engrafted mice.** (A) WBC counts and (B) spleen weights of MPP and CMP transplanted non-engrafters. Each dot represents an individual mouse. (C) The white blood cell differential of the PB was analysed using a HemaVet 950FS. Average percentage neutrophils (NE), lymphocytes (LY), monocytes (MO), eosinophils (EO) and basophils (BA) plotted +/- SD. Average of n=2 MPP, n=3 CMP. HSC and CMP transplanted mice that demonstrated high levels of peripheral engraftment, but did not develop disease, were sacrificed and analysed after 1 year. (D) Spleen weights and (E) WBC counts of HSC and CMP transplanted engrafters. Each dot represents an individual mouse. (F) The white blood cell differential of the PB, average percentage of NE, LY, MO, EO and BA plotted +/- SD. Average of n=3 HSC, n=1 CMP.

**Supplementary Table 1: Primers for Real time PCR (SYBR green)**

| Human   | Forward                         | Reverse                  |
|---------|---------------------------------|--------------------------|
| ABL     | TGGAGATAACACTCTAAGCATAACTAAAGGT | GATGTAGTTGCTTGGGACCCA    |
| BID3    | GGAACCGTTGTTGACCTCAC            | GAGGAGCACAGTGCGGAT       |
| BAX     | GCTGACATGTTTTCTGACGG            | ATGATGGTCTGATCAGTTCC     |
| Xiap    | CGCTCATCGAGGGACGCC              | TCCTTATTGATGCTGCAGGTACAC |
| Mcl1    | CATTCCTGATGCCACCTTCT            | TCGTAAGGACAAAACGGGAC     |
| Bcl2    | GAGAAATCAAACAGAGGCCG            | CTGAGTACCTGAACCGGCA      |
| TRIB2   | AGCCAGACTGTTCTACCAGA            | GGCGTCTTCCAGGCTTTCCA     |
| Bcl2l11 | GGTGAGTCGGATCGCAGC              | GGAACGCTTCAACCGCTG       |
| Mouse   | Forward                         | Reverse                  |
| HPRT1   | GAG AGC GTT GGG CTT ACC TC      | ATCGCTAATCACGACGCTGG     |
| Bcl2    | CTGAGTACCTGAACCGGCAT            | AGAATCCAATCACACCCCAAC    |
